# Supplementary material for: Redox-Modulating Capacity and Antineoplastic Activity of Wastewater Obtained from the Distillation of the Essential Oils of Four Bulgarian Oil-Bearing Roses
Source: MDPI journal article supplement (doi:10.3390/antiox10101615), 2021-10-14
Supplement: s1 [file s1]

**Table S2.** Median inhibitory concentrations of wastewaters obtained from different Roses species in non-tumorigenic and tumorigenic cell lines after 24 h of incubation.

| Roses WW<br>Cell line/Model parameters | <i>WW from Rosa centifolia</i> | <i>WW from Rosa gallica</i> | <i>WW from Rosa damascena</i> | <i>WW from Rosa alba</i> |
|----------------------------------------|--------------------------------|-----------------------------|-------------------------------|--------------------------|
| <b>HEP-G2</b>                          |                                |                             |                               |                          |
| HillSlope                              | 1.376                          | 3.22                        | 2.095                         | 1.675                    |
| <i>IC</i> <sub>50</sub>                | <b>3.344*/261**</b>            | <b>2.939/226</b>            | <b>3.001/216</b>              | <b>2.566/195</b>         |
| R (correlation coefficient)            | 0.90                           | 0.90                        | 0.875                         | 0.903                    |
| <b>HaCaT</b>                           |                                |                             |                               |                          |
| HillSlope                              | 1.28                           | 1.304                       | 1.122                         | 1.319                    |
| <i>IC</i> <sub>50</sub>                | <b>1.56/121</b>                | <b>1.656/127</b>            | <b>2.84/204</b>               | <b>1.85/140</b>          |
| R (correlation coefficient)            | 0.91                           | 0.91                        | 0.92                          | 0.87                     |
| <b>A-375</b>                           |                                |                             |                               |                          |
| HillSlope                              | 1.475                          | 2.602                       | 1.044                         | 1.166                    |
| <i>IC</i> <sub>50</sub>                | <b>0.696/54</b>                | <b>0.823/63</b>             | <b>1.015/73</b>               | <b>0.75/57</b>           |
| R (correlation coefficient)            | 0.93                           | 0.95                        | 0.90                          | 0.90                     |
| <b>A-431</b>                           |                                |                             |                               |                          |
| HillSlope                              | 0.895                          | 1.279                       | 1.663                         | 1.447                    |
| <i>IC</i> <sub>50</sub>                | <b>0.853/67</b>                | <b>1.294/100</b>            | <b>1.852/133</b>              | <b>1.345/102</b>         |
| R (correlation coefficient)            | 0.90                           | 0.91                        | 0.95                          | 0.94                     |

**Legend:** HEP-G2 – liver adenocarcinoma (stage I); HaCaT – normal human keratinocytes; A-375 – malignant melanoma; A-431 – epidermoid carcinoma of the skin; HillSlope – Slope factor or Hill slope, unitless; *IC*<sub>50</sub> – median inhibitory concentration; \*volumetric concentration [%]; \*\*concentration of polyphenols , GAE [µg/mL].
