# Supplementary material for: Redox-Modulating Capacity and Antineoplastic Activity of Wastewater Obtained from the Distillation of the Essential Oils of Four Bulgarian Oil-Bearing Roses
Source: MDPI journal article supplement (doi:10.3390/antiox10101615), 2021-10-14
Supplement: s1 [file s1]

**Table S3.** Median inhibitory concentrations of wastewaters obtained from different Roses species in non-tumorigenic and tumorigenic cell lines after 48 h of incubation.

| Roses WW<br>Cell<br>line/Model<br>parameters | <i>WW from Rosa<br/>centifolia</i> | <i>WW from Rosa<br/>gallica</i> | <i>WW from Rosa<br/>damascena</i> | <i>WW from Rosa<br/>alba</i> |
|----------------------------------------------|------------------------------------|---------------------------------|-----------------------------------|------------------------------|
| <b>HEP-G2</b>                                |                                    |                                 |                                   |                              |
| HillSlope                                    | 0.885                              | 3.023                           | 0.919                             | 1.176                        |
| <i>IC</i> <sub>50</sub>                      | <b>1.44/112</b>                    | <b>2.131/164</b>                | <b>3.338/240</b>                  | <b>1.564/119</b>             |
| R (correlation<br>coefficient)               | 0.94                               | 0.99                            | 0.96                              | 0.93                         |
| <b>HaCaT</b>                                 |                                    |                                 |                                   |                              |
| HillSlope                                    | 0.756                              | 0.949                           | 1.125                             | 0.844                        |
| <i>IC</i> <sub>50</sub>                      | <b>0.618/48</b>                    | <b>0.876/67</b>                 | <b>1.38/99</b>                    | <b>0.835/63</b>              |
| R (correlation<br>coefficient)               | 0.90                               | 0.92                            | 0.90                              | 0.89                         |
| <b>A-375</b>                                 |                                    |                                 |                                   |                              |
| HillSlope                                    | 1.163                              | 1.804                           | 1.313                             | 1.376                        |
| <i>IC</i> <sub>50</sub>                      | <b>0.531/41</b>                    | <b>0.787/61</b>                 | <b>0.737/53</b>                   | <b>0.633/48</b>              |
| R (correlation<br>coefficient)               | 0.91                               | 0.92                            | 0.92                              | 0.90                         |
| <b>A-431</b>                                 |                                    |                                 |                                   |                              |
| HillSlope                                    | 0.941                              | 0.901                           | 1.185                             | 1.138                        |
| <i>IC</i> <sub>50</sub>                      | <b>0.457/36</b>                    | <b>0.615/47</b>                 | <b>0.905/65</b>                   | <b>0.71/54</b>               |
| R (correlation<br>coefficient)               | 0.92                               | 0.90                            | 0.91                              | 0.93                         |

**Legend:** HEP-G2 – liver adenocarcinoma (stage I); HaCaT – normal human keratinocytes; A-375 – malignant melanoma; A-431 – epidermoid carcinoma of the skin; HillSlope – Slope factor or Hill slope, unitless; *IC*<sub>50</sub> – median inhibitory concentration; \*volumetric concentration [%]; \*\*concentration of polyphenols [GAE, µg/mL].
