# Supplementary material for: Redox-Modulating Capacity and Antineoplastic Activity of Wastewater Obtained from the Distillation of the Essential Oils of Four Bulgarian Oil-Bearing Roses
Source: MDPI journal article supplement (doi:10.3390/antiox10101615), 2021-10-14
Supplement: s1 [file s1]

**Table S1** Detected chemical constituents in wastewaters from *Rosa damascena* (RDAM), *R. gallica* (RGAL), *R. centifolia* (RCEN) and *R. alba* (RALB) by UHPLC-HRMS/MS analysis.

| No | Compound name          | RT (min) | Found mass | Species            | Formula                                         | MS/MS (intensity)                                                                        | Wastewater from   |                   |                   |                   |
|----|------------------------|----------|------------|--------------------|-------------------------------------------------|------------------------------------------------------------------------------------------|-------------------|-------------------|-------------------|-------------------|
|    |                        |          |            |                    |                                                 |                                                                                          | RDAM <sup>1</sup> | RGAL <sup>1</sup> | RCEN <sup>1</sup> | RALB <sup>1</sup> |
| 1  | Gallic acid            | 1.66     | 169.0132   | [M-H] <sup>-</sup> | C <sub>7</sub> H <sub>5</sub> O <sub>5</sub>    | 125.023 (100)                                                                            | 3.85              | 9.28              | 4.57              | 5.63              |
| 2  | Glucogallin            | 2.67     | 331.0674   | [M-H] <sup>-</sup> | C <sub>13</sub> H <sub>15</sub> O <sub>10</sub> | 169.0132 (100), 125.023 (60)                                                             | 0.01              | 1.54              | <0.01             | 0.1               |
| 3  | Bis-galloyl-hexose     | 2.89     | 483.0781   | [M-H] <sup>-</sup> | C <sub>20</sub> H <sub>19</sub> O <sub>14</sub> | 331.0675 (30), 313.0571 (20), 169.0131 (100), 125.0231 (75)                              | 1.41              | 0.02              | 2.09              | 0.6               |
| 4  | Protocatechuic acid    | 3.25     | 153.0182   | [M-H] <sup>-</sup> | C <sub>7</sub> H <sub>5</sub> O <sub>4</sub>    | 109.0280 (100)                                                                           | <0.01             | 0.5               | 0.08              | -                 |
| 5  | Bis-galloyl-hexose     | 3.67     | 483.0784   | [M-H] <sup>-</sup> | C <sub>20</sub> H <sub>19</sub> O <sub>14</sub> | 331.0668 (10), 313.0569 (70), 169.0133 (100), 125.0231 (60)                              | 0.23              | -                 | 0.42              | -                 |
| 6  | Bis-galloyl-hexose     | 3.85     | 483.0784   | [M-H] <sup>-</sup> | C <sub>20</sub> H <sub>19</sub> O <sub>15</sub> | 331.0671 (15), 313.0568 (20), 271.0462 (25), 211.0243 (30), 169.0132 (90), 125.0230 (70) | 0.2               | 0.23              | 0.2               | 0.23              |
| 7  | Corilagin              | 4.33     | 633.0739   | [M-H] <sup>-</sup> | C <sub>27</sub> H <sub>21</sub> O <sub>18</sub> | 481.0622 (10), 300.9991 (100), 275.0197 (20)                                             | 0.23              | -                 | 0.45              | -                 |
| 8  | Methylgalloyl-hexoside | 4.66     | 345.0829   | [M-H] <sup>-</sup> | C <sub>14</sub> H <sub>17</sub> O <sub>10</sub> | 183.0290 (100)                                                                           | 0.65              | 3.12              | 0.26              | 0.24              |

|    |                               |      |          |           |                      |                                                                                                          |       |       |       |       |
|----|-------------------------------|------|----------|-----------|----------------------|----------------------------------------------------------------------------------------------------------|-------|-------|-------|-------|
| 9  | Protocatechuic acid glucoside | 4.93 | 315.0726 | $[M-H]^-$ | $C_{13}H_{15}O_9$    | 153.0183 (100)                                                                                           | -     | 0.3   | 0.04  | -     |
| 10 | Proantocianidin B2            | 5.52 | 577.1357 | $[M-H]^-$ | $C_{30}H_{25}O_{12}$ | 425.0893 (10), 407.0768 (60), 425.0893 (80), 161.0232 (20), 125.0230 (100)                               | <0.01 | 0.75  | 0.01  | -     |
| 11 | Bis-galloyl-quinic acid       | 5.61 | 495.0785 | $[M-H]^-$ | $C_{21}H_{19}O_{14}$ | 343.0672 (100), 191.0553 (80), 169.0132 (80), 169.0132 (100), 125.0230 (40)                              | -     | <0.01 | -     | 0.3   |
| 12 | Proantocianidin B-type dimer  | 5.92 | 577.1357 | $[M-H]^-$ | $C_{30}H_{25}O_{13}$ | 407.0772 (50), 289.0717 (70), 125.0231 (100)                                                             | <0.01 | 0.13  | <0.01 | 0.04  |
| 13 | HHDP-di-galloyl-glucose       | 5.96 | 785.0849 | $[M-H]^-$ | $C_{34}H_{25}O_{22}$ | 483.0774 (10), 300.9993 (100), 275.0202 (40), 249.0405 (30), 169.0133 (15), 125.0230 (10)                | <0.01 | -     | 0.72  | -     |
| 14 | Bis-galloyl-hexose            | 6.04 | 483.0785 | $[M-H]^-$ | $C_{20}H_{19}O_{14}$ | 313.0571 (20), 271.0463 (80), 211.0243 (100), 193.0135 (45), 169.0131 (80), 125.0231 (70), 107.0124 (20) | 0.11  | <0.01 | <0.01 | <0.01 |
| 15 | Bis-galloyl-quinic acid       | 6.12 | 495.0785 | $[M-H]^-$ | $C_{21}H_{19}O_{14}$ | 343.0670 (70), 325.0572 (10), 191.0550 (15), 169.0133 (100), 125.0230 (40)                               | -     | <0.01 | -     | 0.3   |
| 16 | Catechin                      | 6.18 | 289.0719 | $[M-H]^-$ | $C_{15}H_{13}O_6$    | 245.0816 (50), 203.0707 (30), 179.0342 (20), 151.0389 (20), 123.0439 (40), 109.0280 (60)                 | 0.4   | 5.16  | 0.74  | 2.2   |
| 17 | Chlorogenic acid              | 6.70 | 353.0880 | $[M-H]^-$ | $C_{16}H_{17}O_9$    | 191.0554 (100), 179.0340 (10), 173.0446 (15), 135.0439 (10)                                              | <0.01 | <0.01 | <0.01 | <0.01 |
| 18 | Brevifolincarboxylic acid     | 6.99 | 291.0149 | $[M-H]^-$ | $C_{13}H_7O_8$       | 247.0245 (100), 219.0293 (10), 191.0341 (20), 173.0235 (10), 145.0282 (10)                               | <0.01 | 1.08  | <0.01 | 1.34  |

|    |                                         |       |          |              |                      |                                                                                                         |       |       |       |       |
|----|-----------------------------------------|-------|----------|--------------|----------------------|---------------------------------------------------------------------------------------------------------|-------|-------|-------|-------|
| 19 | Tris-galoyl-hexose                      | 7.02  | 635.0892 | $[M-H]^-$    | $C_{27}H_{23}O_{18}$ | 465.0671 (75), 421.0781 (10), 313.0570 (45), 169.0131 (100), 125.0231 (65)                              | 1.67  | -     | 2.26  | -     |
| 20 | HHDP-di-galloyl-glucose                 | 8.29  | 785.0848 | $[M-H]^-$    | $C_{34}H_{25}O_{22}$ | 483.0786 (10), 300.9992 (100), 275.0202 (35), 249.0406 (25), 169.0132 (13), 125.0230 (15)               | 0.53  | -     | 1.31  | -     |
| 21 | Epicatechin                             | 8.66  | 289.0721 | $[M-H]^-$    | $C_{15}H_{13}O_6$    | 245.0092 (70), 217.0136 (20), 189.0184 (15), 173.0234 (20), 161.0233 (18), 145.0282 (35), 117.0332 (17) | <0.01 | 0.35  | <0.01 | <0.01 |
| 22 | Digalloyl deoxyhexose                   | 8.70  | 467.0831 | $[M-H]^-$    | $C_{20}H_{19}O_{13}$ | 423.0932 (25), 315.0726 (20), 169.0131 (40), 152.0103 (35), 125.0230 (30), 108.0202 (45)                | -     | -     | -     | 0.31  |
| 23 | Phenylethyl-hexoside-pentoside          | 8.89  | 461.1669 | $[M+FA-H]^-$ | $C_{20}H_{29}O_{12}$ | 415.1608 (100), 269.1029 (70), 169.0132 (15), 161.0446 (30), 101.0229 (40)                              | -     | -     | -     | 0.15  |
| 24 | Phenylethyl-hexoside-pentoside          | 9.49  | 461.1667 | $[M+FA-H]^-$ | $C_{20}H_{29}O_{12}$ | 415.1614 (10), 191.0554 (55), 179.0552 (25), 149.0444 (80), 131.0337 (80)                               | 2.12  | -     | 0.48  | 0.49  |
| 25 | 1'-Monodecarboxyvaloneic acid dilactone | 9.88  | 469.0051 | $[M+FA-H]^-$ | $C_{21}H_9O_{13}$    | 425.0151 (15), 299.9913 (100), 270.9887 (10)                                                            | <0.01 | <0.01 | <0.01 | <0.01 |
| 26 | Ellagic acid hexoside                   | 9.92  | 463.0522 | $[M-H]^-$    | $C_{20}H_{15}O_{13}$ | 300.9990 (100)                                                                                          | -     | 2.41  | -     | -     |
| 27 | Ellagic acid hexoside                   | 10.46 | 463.0521 | $[M-H]^-$    | $C_{20}H_{15}O_{13}$ | 300.9992 (100)                                                                                          | <0.01 | 0.27  | <0.01 | <0.01 |
| 28 | Phenylethyl-hexoside-pentoside          | 10.49 | 461.1666 | $[M+FA-H]^-$ | $C_{20}H_{29}O_{12}$ | 415.1609 (20), 179.0551 (20), 149.0444 (70), 131.0337 (30)                                              | 1.74  | <0.01 | 0.05  | <0.01 |
| 29 | Quercetine-3-O-hexoside-hexoside        | 11.20 | 625.1409 | $[M-H]^-$    | $C_{27}H_{29}O_{17}$ | 300.0277 (100), 271.0247 (45), 255.0296 (20), 243.0296 (16)                                             | -     | -     | -     | 6.96  |

|    |                                   |       |          |                    |                                                 |                                                                                                                                                     |       |       |       |       |
|----|-----------------------------------|-------|----------|--------------------|-------------------------------------------------|-----------------------------------------------------------------------------------------------------------------------------------------------------|-------|-------|-------|-------|
| 30 | Quercetine-3-O-hexoside-hexoside  | 11.42 | 625.1408 | [M-H] <sup>-</sup> | C <sub>27</sub> H <sub>29</sub> O <sub>17</sub> | 300.0277 (100), 271.0247 (45), 255.0296 (20), 243.0296 (16)                                                                                         | -     | -     | -     | 6.2   |
| 31 | Isorhamnetin-3-O-gentiobioside    | 12.40 | 639.1573 | [M-H] <sup>-</sup> | C <sub>28</sub> H <sub>31</sub> O <sub>17</sub> | 314.0435 (60), 299.0200 (100), 271.0250 (35), 215.0345 (20)                                                                                         | 0.32  | 0.75  | -     | 0.13  |
| 32 | Kaempferol-3-O-hexoside-hexoside  | 12.78 | 609.1463 | [M-H] <sup>-</sup> | C <sub>27</sub> H <sub>29</sub> O <sub>16</sub> | 284.0328 (100), 255.0298 (60), 227.0346 (45)                                                                                                        | -     | -     | -     | 0.57  |
| 33 | Ellagoyl-pentoside                | 12.93 | 433.0414 | [M-H] <sup>-</sup> | C <sub>19</sub> H <sub>13</sub> O <sub>12</sub> | 300.9991 (100), 271.0612 (10), 216.0057 (10)                                                                                                        | <0.01 | 0.12  | 0.25  | -     |
| 34 | Kaempferol-3-O-hexoside-hexoside  | 13.01 | 609.1461 | [M-H] <sup>-</sup> | C <sub>27</sub> H <sub>29</sub> O <sub>16</sub> | 284.0327 (100), 255.0296 (60), 227.0345 (40)                                                                                                        | -     | -     | -     | 4.63  |
| 35 | Quercetine-3-O-pentoside-hexoside | 13.29 | 595.1309 | [M-H] <sup>-</sup> | C <sub>26</sub> H <sub>27</sub> O <sub>16</sub> | 300.0277 (100), 271.0247 (40), 255.0297 (20), 243.0296 (10)                                                                                         | -     | -     | -     | 0.53  |
| 36 | Ellagoyl-pentoside                | 13.35 | 433.0414 | [M-H] <sup>-</sup> | C <sub>19</sub> H <sub>13</sub> O <sub>12</sub> | 299.9911 (100), 216.0060 (10)                                                                                                                       | 0.09  | 0.09  | 0.06  | -     |
| 37 | Ellagic acid                      | 13.56 | 300.9988 | [M-H] <sup>-</sup> | C <sub>14</sub> H <sub>5</sub> O <sub>8</sub>   | 300.9990 (100), 283.9963 (90), 257.0085 (20), 245.0088 (5), 229.0138 (70), 201.0183 (80) 185.0236 (70), 173.0233 (75), 157.0283 (45), 145.0282 (75) | 10.98 | 16.88 | 12.89 | 14.12 |
| 38 | Rutin                             | 13.80 | 609.1463 | [M-H] <sup>-</sup> | C <sub>27</sub> H <sub>29</sub> O <sub>16</sub> | 300.0279 (100), 271.0251 (50), 255.0300 (25), 243.0297 (15), 151.0024 (10)                                                                          | <0.01 | -     | -     | <0.01 |
| 39 | Hyperoside                        | 13.89 | 463.0883 | [M-H] <sup>-</sup> | C <sub>21</sub> H <sub>19</sub> O <sub>12</sub> | 300.0274 (100), 271.0251 (45), 255.0300 (20), 243.0297 (15), 151.0025 (10)                                                                          | 5.67  | 4.69  | 5.8   | 3.68  |
| 40 | Miquelianin                       | 13.97 | 477.0671 | [M-H] <sup>-</sup> | C <sub>21</sub> H <sub>17</sub> O <sub>13</sub> | 301.0356 (100), 178.9977 (15), 151.0024 (25)                                                                                                        | <0.01 | <0.01 | <0.01 | 8.64  |

|    |                                     |       |          |                    |                                                 |                                                                                           |       |       |       |       |
|----|-------------------------------------|-------|----------|--------------------|-------------------------------------------------|-------------------------------------------------------------------------------------------|-------|-------|-------|-------|
| 41 | Isoquercitrin                       | 14.25 | 463.0883 | [M-H] <sup>-</sup> | C <sub>21</sub> H <sub>19</sub> O <sub>12</sub> | 300.0275 (100), 271.0252 (50), 255.0300 (25), 243.0298 (15), 151.0025 (10)                | 5.98  | 0.43  | 5.89  | 3.57  |
| 42 | Quercetin-3-O-pentoside             | 15.01 | 433.0777 | [M-H] <sup>-</sup> | C <sub>20</sub> H <sub>17</sub> O <sub>11</sub> | 300.0276 (100), 271.0247 (50), 255.0296 (20), 243.0297 (15), 151.0025 (10)                | 0.5   | -     | 1.82  | 0.12  |
| 43 | Quercetin-3-O-galloyl-hexoside      | 15.11 | 615.0997 | [M-H] <sup>-</sup> | C <sub>28</sub> H <sub>23</sub> O <sub>16</sub> | 301.0356 (100), 193.0138 (10), 178.9976 (15), 151.0025 (30)                               | 0.58  | 0.37  | -     | 0.16  |
| 44 | Kaempferol-3-O-pentoside-hexoside   | 15.20 | 579.1360 | [M-H] <sup>-</sup> | C <sub>26</sub> H <sub>27</sub> O <sub>15</sub> | 284.0327 (100), 255.0297 (55), 227.0346 (40)                                              | -     | -     | -     | 0.36  |
| 45 | Kaempferol-3-O-galactoside          | 15.48 | 447.0933 | [M-H] <sup>-</sup> | C <sub>21</sub> H <sub>19</sub> O <sub>11</sub> | 284.0328 (85), 255.0297 (80), 227.0346 (75)                                               | 4.63  | 1.6   | 0.95  | 1.33  |
| 46 | Kaempferol-hexoside-methylpentoside | 15.76 | 593.1514 | [M-H] <sup>-</sup> | C <sub>27</sub> H <sub>29</sub> O <sub>15</sub> | 285.0404 (100), 255.0298 (45), 227.0345 (30)                                              | 2.07  | -     | <0.01 | <0.01 |
| 47 | Avicularin                          | 15.78 | 433.0776 | [M-H] <sup>-</sup> | C <sub>20</sub> H <sub>17</sub> O <sub>11</sub> | 301.0351 (100), 271.0252 (45), 255.0301 (25), 243.0298 (15), 178.9977 (10), 151.0025 (15) | <0.01 | 3.09  | 5.18  | 4.3   |
| 48 | Quercetin-hexoside-methylpentoside  | 15.90 | 609.1460 | [M-H] <sup>-</sup> | C <sub>27</sub> H <sub>29</sub> O <sub>16</sub> | 301.0354 (100), 271.0248 (30), 255.0298 (20), 243.0296 (10), 178.9979 (15), 151.0025 (30) | 1.09  | <0.01 | -     | -     |
| 49 | Kaempferol-3-O-glucoside            | 16.24 | 447.0933 | [M-H] <sup>-</sup> | C <sub>21</sub> H <sub>19</sub> O <sub>11</sub> | 284.0326 (78), 255.0297 (80), 227.0346 (78), 183.0444 (10)                                | 16.53 | 1.02  | 2.98  | 6     |
| 50 | Kaempferol-galloyl-hexoside         | 17.22 | 599.1047 | [M-H] <sup>-</sup> | C <sub>28</sub> H <sub>23</sub> O <sub>15</sub> | 313.0568 (15), 285.0406 (100), 151.0024 (10)                                              | 1.29  | -     | -     | 0.23  |
| 51 | Kaempferol-pentoside                | 17.36 | 417.0828 | [M-H] <sup>-</sup> | C <sub>20</sub> H <sub>17</sub> O <sub>10</sub> | 284.0326 (85), 255.0298 (80), 227.0346 (83), 183.0444 (10)                                | 2.15  | <0.01 | 0.84  | <0.01 |

|    |                                              |       |          |                    |                                                 |                                                                                                          |       |       |       |      |
|----|----------------------------------------------|-------|----------|--------------------|-------------------------------------------------|----------------------------------------------------------------------------------------------------------|-------|-------|-------|------|
| 52 | Eschweilenol A                               | 17.49 | 425.0152 | [M-H] <sup>-</sup> | C <sub>20</sub> H <sub>9</sub> O <sub>11</sub>  | 299.9911 (100), 270.9887 (10), 216.0058 (10)                                                             | -     | 4.72  | 1.2   | 2.78 |
| 53 | Kampferol-3-O-arabinoside                    | 18.01 | 417.0828 | [M-H] <sup>-</sup> | C <sub>20</sub> H <sub>17</sub> O <sub>10</sub> | 284.0325 (100), 255.0298 (95), 227.0346 (90), 183.0444 (10)                                              | 5.32  | 2.49  | 2.49  | 2.81 |
| 54 | Kaempferol-hexoside-methylpentoside          | 18.08 | 593.1514 | [M-H] <sup>-</sup> | C <sub>27</sub> H <sub>29</sub> O <sub>15</sub> | 285.0404 (100), 229.0504 (10)                                                                            | <0.01 | <0.01 | -     | -    |
| 55 | Kaempferol-3-O-rhamnoside                    | 18.78 | 431.0983 | [M-H] <sup>-</sup> | C <sub>21</sub> H <sub>19</sub> O <sub>10</sub> | 285.0402 (100), 255.0297 (65), 227.0346 (60), 183.0445 (10)                                              | 5.4   | 0.81  | 4.6   | 1.24 |
| 56 | Quercetin-3-acetyl-hexoside-methylpentoside  | 19.50 | 651.1574 | [M-H] <sup>-</sup> | C <sub>29</sub> H <sub>31</sub> O <sub>17</sub> | 301.0354 (100), 271.0251 (35), 255.0299 (20), 243.0296 (10), 178.9975 (20), 151.0024 (35)                | 0.62  | 0.12  | -     | -    |
| 57 | Kaempferol-galloyl-pentose                   | 19.60 | 569.0943 | [M-H] <sup>-</sup> | C <sub>27</sub> H <sub>21</sub> O <sub>14</sub> | 285.0404 (100), 229.0503 (10)                                                                            | <0.01 | -     | 0.05  | -    |
| 58 | Quercetin-p-coumaroyl-hexoside               | 20.91 | 609.1255 | [M-H] <sup>-</sup> | C <sub>30</sub> H <sub>25</sub> O <sub>14</sub> | 463.0883 (65), 300.0275 (100), 271.0252 (50), 255.0300 (25), 243.0297 (15), 178.9975 (10), 151.0024 (15) | 0.19  | 0.17  | 0.7   | 0.35 |
| 59 | Quercetin                                    | 21.33 | 301.0355 | [M-H] <sup>-</sup> | C <sub>15</sub> H <sub>9</sub> O <sub>7</sub>   | 178.9977 (25), 151.0025 (70), 121.0281 (20), 107.0124 (25), 65.0017 (25)                                 | -     | 0.16  | 1.25  | 0.55 |
| 60 | Kaempferol-3-acetyl-hexoside-methylpentoside | 21.76 | 635.1618 | [M-H] <sup>-</sup> | C <sub>29</sub> H <sub>31</sub> O <sub>16</sub> | 285.0402 (100), 229.0503 (10)                                                                            | 0.06  | <0.01 | -     | -    |
| 61 | Eschweilenol B isomer                        | 21.82 | 422.9996 | [M-H] <sup>-</sup> | C <sub>20</sub> H <sub>7</sub> O <sub>11</sub>  | 376.9933 (70), 311.0203 (70), 299.9909 (70), 293.0093 (65), 270.9884 (100)                               | <0.01 | 1.83  | 2.95  | 2.07 |
| 62 | Kaempferol-galloyl-pentose                   | 22.25 | 569.0941 | [M-H] <sup>-</sup> | C <sub>27</sub> H <sub>21</sub> O <sub>14</sub> | 285.0405 (100), 229.0504 (10)                                                                            | 0.16  | -     | <0.01 | -    |

|    |                                 |       |          |                    |                                                 |                                                                                                                                        |       |      |      |      |
|----|---------------------------------|-------|----------|--------------------|-------------------------------------------------|----------------------------------------------------------------------------------------------------------------------------------------|-------|------|------|------|
| 63 | Eschweilenol B isomer           | 22.71 | 422.9999 | [M-H] <sup>-</sup> | C <sub>20</sub> H <sub>7</sub> O <sub>11</sub>  | 376.9946 (70), 311.0197 (100), 299.9907 (55), 293.0095 (85), 270.9887 (85)                                                             | <0.01 | 0.21 | 0.26 | 0.39 |
| 64 | Kaempferol-p-coumaroyl-hexoside | 23.17 | 593.1303 | [M-H] <sup>-</sup> | C <sub>30</sub> H <sub>25</sub> O <sub>13</sub> | 447.0940 (10), 285.0404 (100), 255.0299 (55), 227.0346 (45), 145.0285 (10)                                                             | 2.72  | 0.83 | 1.09 | 1.14 |
| 65 | Kaempferol-p-coumaroyl-hexoside | 23.66 | 593.1305 | [M-H] <sup>-</sup> | C <sub>30</sub> H <sub>25</sub> O <sub>13</sub> | 447.0932 (10), 285.0402 (100), 255.0297 (55), 227.0346 (40), 145.0282 (10)                                                             | 0.21  | -    | -    | 0.1  |
| 66 | Kaempferol                      | 25.57 | 285.0407 | [M-H] <sup>-</sup> | C <sub>15</sub> H <sub>9</sub> O <sub>6</sub>   | 285.0407 (100), 255.0288 (25), 239.0343 (40), 227.0351 (30), 211.0394 (35), 185.0599 (50), 159.0438 (45), 143.0489 (60), 135.0072 (20) | 0.56  | -    | 0.2  | 0.04 |

<sup>1</sup> The values are calculated by normalization method and represent the percent of the area of the base peak. The raw data were processed with Thermo Scientific Freestyle software package.
